# Supplementary material
Source: HighWire-hosted journal article supplement (https://bmjopensem.bmj.com/content/4/1/e000346)
Supplement: inline-supplementary-material-2 [file inline-supplementary-material-2.pdf]

## Appendix 2

### Grey literature websites searched

#### UK National Bodies

- National Institute for Health and Clinical Excellence (NICE) (<http://www.nice.org.uk>)
- Public Health England (<https://www.gov.uk/government/organisations/public-health-england>)
- Public Health Wales (<http://www.wales.nhs.uk/sitesplus/888/home>)
- Scottish Public Health Network (<http://www.healthscotland.com/resources/networks/scotphn/about.aspx>)
- Public Health Agency NI (<http://www.publichealth.hscni.net>)

#### UK Government Websites

- Department for Education
  - Statutory Guidance for Schools (<https://www.gov.uk/government/collections/statutory-guidance-schools>)
  - Policies (<https://www.gov.uk/government/policies?organisations%5B%5D=department-for-education>)
  - Sports participation (<https://www.gov.uk/government/policies/sports-participation>)
  - Expert subject groups (<http://www.expertsubjectgroups.co.uk/resources/>)
- Department for Culture, Media and Sport (<https://www.gov.uk/government/organisations/department-for-culture-media-sport>)
  - Sports participation (<https://www.gov.uk/government/policies/sports-participation>)
  - Ongoing 'Duty of Care Review' for sports (<https://www.gov.uk/government/consultations/sport-duty-of-care-review-call-for-evidence>)
- Department for Health
  - Children's health (<https://www.gov.uk/government/policies/children-s-health>)
- Department for communities and local government
  - <https://www.gov.uk/government/policies?organisations%5B%5D=department-for-communities-and-local-government>

#### UK Charities and Sporting Organisations

- Child Accident Prevention Trust (UK) (<http://www.capt.org.uk/>)
- Barnado's Policy and Research Unit (UK) ([http://www.barnardos.org.uk/what we do/policy\\_research\\_unit.htm](http://www.barnardos.org.uk/what_we_do/policy_research_unit.htm))
- Action for Children (<http://www.actionforchildren.org.uk/>)
- National Children's Bureau (UK) (<http://www.ncb.org.uk/>)
- Children in Wales (UK) (<http://www.childreninwales.org.uk/index.html>)

- Homestart (UK) (<http://www.home-start.org.uk/homepage>)
- Youth Sport Trust (<https://www.youthsporttrust.org>)
- UK Sport (<http://www.uk-sport.gov.uk/>)
  - Sport England (<https://www.sportengland.org>)
  - Sports Scotland (<https://sportscotland.org.uk>)
  - Sport Wales (<http://sport.wales>)
  - Sport Northern Ireland (<http://www.sportni.net>)
- British Council (<https://www.britishcouncil.org/society/sport>)
- Local council sports organisations such as Wesport (West of England Sports trust) <http://www.wesport.org.uk/>
- Injury Minimization Programme for schools (<http://www.impsweb.co.uk/>)
- Child Accident Prevention Trust (<http://www.capt.org.uk/what-we-do>)
- County Sports Partnership Network (<http://www.cspnetwork.org>)
- Sports coach UK (<http://www.sportscoachuk.org>)
- UK Active (<http://www.ukactive.com>)
- Sports Leaders UK <http://www.sportsleaders.org/>
- Sport and Recreational Alliance (<http://www.sportandrecreation.org.uk>)
- Royal Society for the Prevention of Accidents (<http://www.rosipa.com/>)
- National Society for the Prevention of Cruelty to Children; National Child Protection in Sport Unit (<https://thecpsu.org.uk>)

#### National Professional Associations

- Association for Physical Education (<http://www.afpe.org.uk/physical-education/safe-practice-in-physical-education-school-sport-physical-activity-2016/>)
- British Athletics (<http://www.britishathletics.org.uk>)

#### International Organisations

##### *International*

- International Society for Child and Adolescent Injury Prevention (<http://iscaip.net/iscaip/> - searched December 2010)

##### *USA*

- Injury Prevention Research Center at the Centers for Disease Control and Prevention (USA) (<http://www.cdc.gov/injury/>)
- Children's Safety Network (USA) (<http://www.childrensafetynetwork.org/>)
- Injury Control Resource Information Network (USA) (<http://www.injurycontrol.com/icrin/research.htm>).
- Injury Prevention Web and SafetyLit (USA) (<http://www.safetylit.org/>)

##### *Australia*

- National Injury Surveillance Unit (Australia) (<http://www.nisu.flinders.edu.au/>)
